- diethyl ether, halothane, and isoflurane. *ANESTHESIOLOGY* 2006; 105:498–502
47. Sabbadini M, Yost CS: Molecular biology of background K channels: Insights from K(2P) knockout mice. *J Mol Biol* 2009; 385:1331–44
  48. Nie X, Arrighi I, Kaissling B, Pfaff I, Mann J, Barhanin J, Vallon V: Expression and insights on function of potassium channel TWIK-1 in mouse kidney. *Pflugers Arch* 2005; 451:479–88
  49. Aller MI, Veale EL, Linden AM, Sandu C, Schwaninger M, Evans LJ, Korpi ER, Mathie A, Wisden W, Brickley SG: Modifying the subunit composition of TASK channels alters the modulation of a leak conductance in cerebellar granule neurons. *J Neurosci* 2005; 25:11455–67
  50. Mulkey DK, Talley EM, Stornetta RL, Siegel AR, West GH, Chen X, Sen N, Mistry AM, Guyenet PG, Bayliss DA: TASK channels determine pH sensitivity in select respiratory neurons but do not contribute to central respiratory chemosensitivity. *J Neurosci* 2007; 27:14049–58
  51. Kitchen I, Slowe SJ, Matthes HW, Kieffer B: Quantitative autoradiographic mapping of mu-, delta- and kappa-opioid receptors in knockout mice lacking the mu-opioid receptor gene. *Brain Res* 1997; 778:73–88

## ANESTHESIOLOGY REFLECTIONS

### The Irish Connections of Patrick Sim, M.L.S.

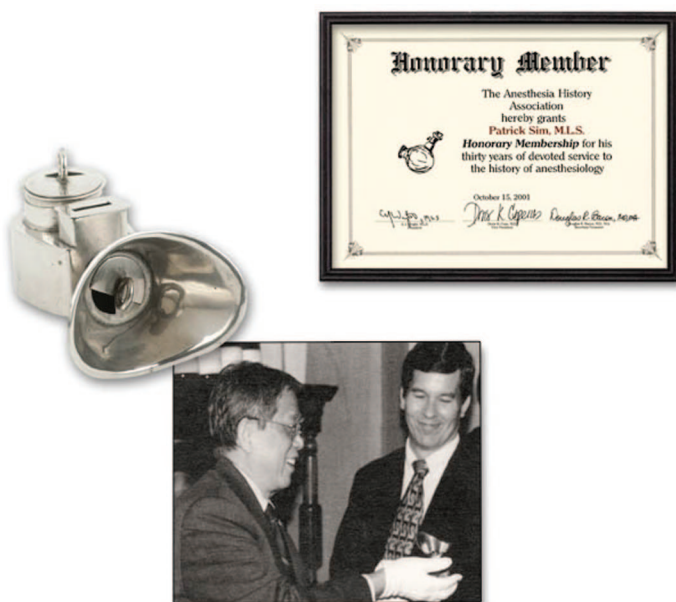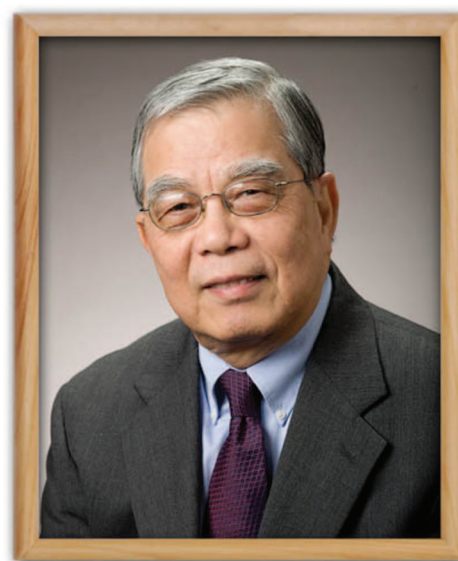

**Patrick P. Sim, MLS (1939 - 2010)**

Decades before he would be celebrated as the American Society of Anesthesiologists' Paul M. Wood Distinguished Librarian Emeritus, a young boy named Sim Pui-Kam matriculated at Hong Kong's famous St. Joseph's College, a Catholic boys' school where most classes were taught in English (i.e., English with an Irish accent). The Lasallian Brothers who ran the school were mostly Irishmen, so, naturally, they christened the young man "Patrick" Pui-Kam Sim. In 2001 Sim was granted an Honorary Membership in the Anesthesia History Association, one of whose council members would donate a Murphy Chloroform Inhaler to the Wood Library-Museum (WLM) in honor of "Irish" Patrick Sim. The WLM salutes our fallen Librarian, Patrick Sim (1939–2010). (Copyright © the American Society of Anesthesiologists, Inc. This image appears in color in the *Anesthesiology Reflections* online collection available at [www.anesthesiology.org](http://www.anesthesiology.org).)

George S. Bause, M.D., M.P.H., Honorary Curator, ASA's Wood Library-Museum of Anesthesiology, Park Ridge, Illinois, and Clinical Associate Professor, Case Western Reserve University, Cleveland, Ohio. [UJYC@aol.com](mailto:UJYC@aol.com).
